# Supplementary material for: Microenvironment-mediated reversion of epiblast stem cells by reactivation of repressed JAK–STAT signaling
Source: Royal Society of Chemistry journal article supplement (doi:10.1039/c2ib20098h), 2012-01-01
Supplement: c2ib20098h.pdf [file c2ib20098h.pdf]

Table S1. Primers used in this study.

| Gene                | Forward Primer            | Reverse Primer           |
|---------------------|---------------------------|--------------------------|
| <i>oct4</i>         | AGTTGGCGTGGAGACTTTGC      | CAGGGCTTTCATGTCCTGG      |
| <i>nanog</i>        | TTGCTTACAAGGGTCTGCTACT    | ACTGGTAGAAGAATCAGGGCT    |
| <i>sox2</i>         | GCTCGCAGACCTACATGAAC      | GCC TCGGACTTGACCACAG     |
| <i>socs3</i>        | CAAGAACCTACGCATCCAGTG     | CCAGCTTGAGTACACAGTCGAA   |
| <i>stat3</i>        | TGGCACCTTGATTGAGAGTC      | GCAGGAATCGGCTATATTGCT    |
| <i>gp130</i>        | ATCAGAGTGGGCAACAGAGAA     | TGAGGAGACCTTCCCAAGGG     |
| <i>lif-r</i>        | ACCTCCTCCTTACTACTGAAGTG   | TTCCGTCCTTGATTCTGTAGA    |
| <i>klf2</i>         | CTCAGCGAGCCTATCTTGCC      | CACGTTGTTTAGGTCCTCATCC   |
| <i>klf4</i>         | TCCTTTCCAACCTCGCTAACCC    | CGGATCGGATAGCTGAAGCTG    |
| <i>pecam1</i>       | ACGCTGGTGCTCTATGCAAG      | TCAGTTGCTGCCCATTCATCA    |
| <i>e-cadherin</i>   | CAGGTCTCCTCATGGCTTTGC     | CTTCCGAAAAGAAGGCTGTCC    |
| <i>tbx3</i>         | AGGAGCGTGTCTGTCAGGTT      | GCCATTACCTCCCCAATTTT     |
| <i>rex1</i>         | CCCTCGACAGACTGACCCTAA     | TCGGGGCTAATCTCACTTTCAT   |
| <i>fgf5</i>         | TGTGTCTCAGGGGATTGTAGG     | AGCTGTTTTCTTGGAATCTCTCC  |
| <i>alp</i>          | CAGTATGAATTGAATCGGAACAACC | CAGCAAGAAGAAGCCTTTGAGG   |
| <i>dppa3/stella</i> | GACCCAATGAAGGACCCTGAA     | GCTTGACACCGGGGTTTAG      |
| <i>dazl</i>         | ATGTCTGCCACAACCTTCTGAG    | CTGATTTTCGTTTTCATCCATCCT |
| <i>stra8</i>        | ACAACCTAAGGAAGGCAGTTTAC   | GACCTCCTCTAAGCTGTTGGG    |
| <i>nr0b1/dax1</i>   | GGGCAGCATCTTATACAGCTTG    | CACTCTGGGTACAGTAGGACAG   |
| <i>fbxo15</i>       | TCGTGGGACTGAGCACAACCTA    | TGACAGATGAGCCTCTAACAAAC  |
| <i>piwil2</i>       | TTGGCCTCAAGCTCCTAGAC      | GAACATGGACACCAAACCTACA   |
| <i>gbx2</i>         | CAACTTCGACAAAGCCGAGG      | ACTCGTCTTTCCCTTGCCCT     |
| <i>gdf3</i>         | ATGCAGCCTTATCAACGGCTT     | AGGCGCTTTCTCTAATCCCAG    |
| <i>tdgf1</i>        | CAGTGCGTTTGAATTTGGACC     | GCACGAACTGGAAAGACCGA     |
| <i>c-myc</i>        | TCTCCATCCTATGTTGCGGTC     | TCCAAGTAACTCGGTCATCATCT  |
| <i>nodal</i>        | GTGACCGGACAGAACTGGAC      | GGAAAATGTCAATGGTGAGTGGG  |
| <i>acvr2b</i>       | ACCCCCAGGTGTACTTCTG       | CATGGCCGTAGGGAGGTTTC     |
| <i>gal</i>          | GGCAGCGTTATCCTGCTAGG      | CTGTTCAAGGTCCAACCTCT     |
| <i>cldn6</i>        | ATGGCCTCTACTGGTCTGCAA     | GCCAACAGTGAGTCATACACCTT  |
| <i>otx2</i>         | TATCTAAAGCAACCGCCTTACG    | AAGTCCATACCCGAAGTGGTC    |
| <i>ebaf</i>         | CCAACCGCACTGCCCTTAT       | CGCGAAACGAACCAACTTGT     |
| <i>lefty2</i>       | CAGCCAGAATTTTCGAGAGGT     | CAGTGCGATTGGAGCCATC      |
| <i>foxa2</i>        | CCCTACGCCAACATGAACTCG     | GTTCTGCCGGTAGAAAGGGA     |
| <i>eomes</i>        | GGCCCCCTATGGCTCAAATTCC    | CCTGCCCTGTTTGGTGATG      |
| <i>dkk1</i>         | CTCATCAATTCCAACGCGATCA    | GCCCTCATAGAGAACTCCCG     |
| <i>gata6</i>        | GGCAGTGTGAGTGGAGGTG       | TGGTACGTTCCGTTTCAGCG     |
| <i>sox17</i>        | GATGCGGGATACGCCAGTG       | CCACCACCTCGCCTTTCAC      |
| <i>cer1</i>         | CTCTGGGGAAGGCAGACCTAT     | CCACAAACAGATCCGGCTT      |
| <i>pitx2</i>        | GCAGCCGTTGAATGTCTCTTC     | GTCCGTGAACTCGACCTTTTTT   |
| <i>acta2</i>        | GTCCCAGACATCAGGGAGTAA     | TCGGATACTTCAGCGTCAGGA    |

|                |                        |                         |
|----------------|------------------------|-------------------------|
| <i>egr1</i>    | TCGGCTCCTTTCCTCACTCA   | CTCATAGGGTTGTTGCTCGG    |
| <i>gapdh</i>   | AGGTCGGTGTGAACGGATTTG  | TGTAGACCATGTAGTTGAGGTCA |
| <i>b-actin</i> | GAAATCGTGCGTGACATCAAAG | TGTAGTTTCATGGATGCCACAG  |

**Table S2**

**Colony counts of ALP-positive CDEs (cells seeded at  $10^5$  unless otherwise noted)**

| CDE                                | CDE- $\mu$ P | CDE- $\mu$ P <sub>LIF</sub> |
|------------------------------------|--------------|-----------------------------|
| 0                                  | 11           | 28                          |
| 3                                  | 24           | 32                          |
| 6<br>(seeded @ $7.5 \times 10^4$ ) | 26           | 44                          |
| 7                                  | 28           | 59                          |
| 8                                  |              | 70                          |

**Colony counts of ALP-positive 129S2C1a (cells seeded at  $10^5$  unless otherwise noted)**

| 129S2C1a | 129S2C1a- $\mu$ P | 129S2C1a- $\mu$ P <sub>LIF</sub>   |
|----------|-------------------|------------------------------------|
| 0        | 57                | 301                                |
| 1        | 166               | 433                                |
| 8        | 176               | 455                                |
|          |                   | 108<br>(seeded @ $5 \times 10^4$ ) |

Figure S1

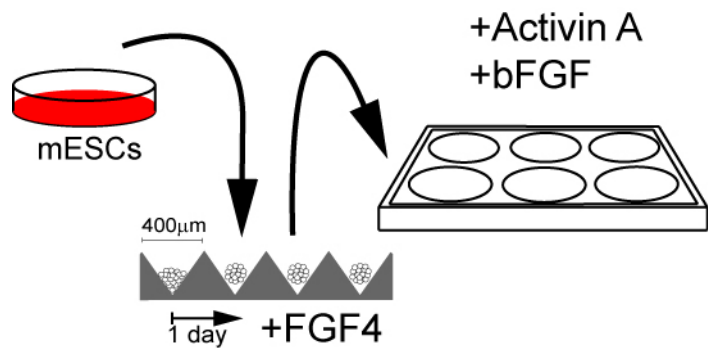

Figure S2

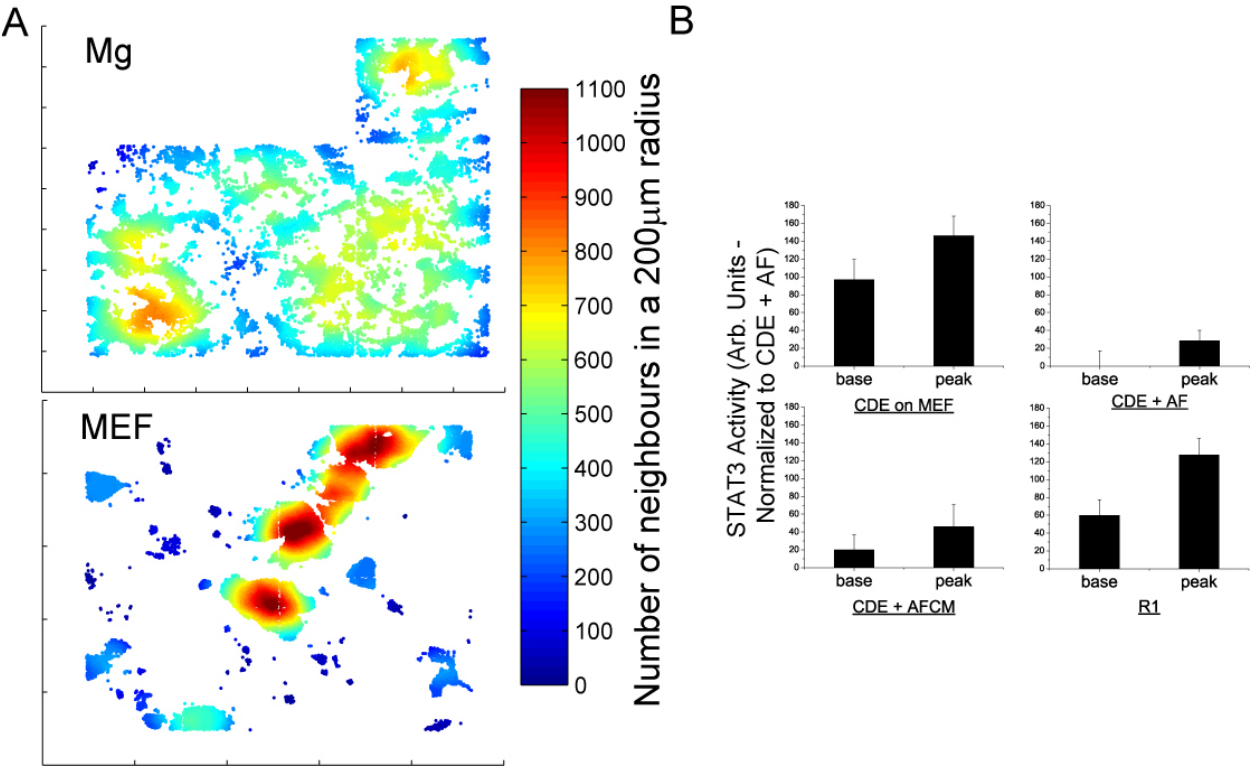

Figure S3

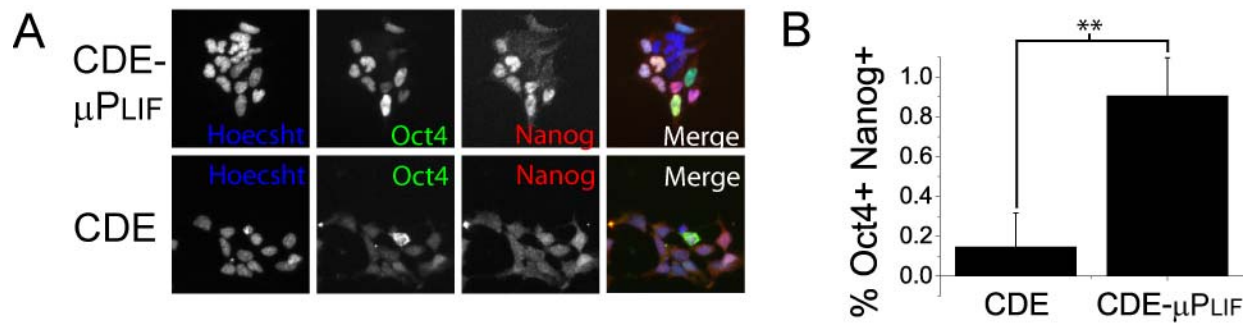

Figure S4

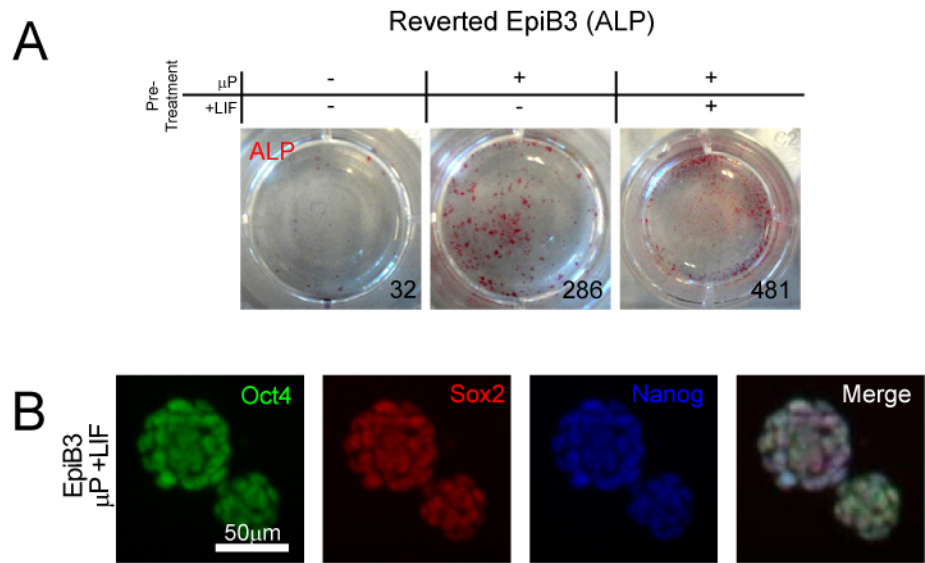

**Figure S1. Protocol for generation of CDEs.** CDEs were derived from mESCs by size-controlled aggregation using microwells followed by culture in the microwells in the presence of 10ng/ml FGF4 for 1 day and then seeding onto Matrigel-coated plates in 20ng/ml Activin A and 20ng/ml bFGF.

**Figure S2. CDEs cultured on MEFs demonstrate an increase in local cell density and increase in LIF responsiveness.** A) Choropleth map of the number of neighbours in 200mm radius in Matrigel (Mg)-coated plates(top panel) vs. MEF co-culture (bottom panel) B) Quantification of pSTAT3 staining in CDEs cultured on MEFs (MEF), CDEs cultured on Mg in AF media alone (AF), CDEs cultured on Mg in MEF-conditioned AF media (AF<sub>CM</sub>), and R1 mESCs (R1). Data represented as mean  $\pm$  S.D. (n=4).

**Figure S3. Staining for Oct4 and Nanog predicts reversion frequency at 2 days following seeding.** A) Micropatterned CDEs treated with LIF were plated into 2iL media (CDE- $\mu$ P<sub>LIF</sub>) and stained for Oct4 and Nanog after 2 days B) Quantification of Oct4/Nanog double positive cells. Data represented as mean  $\pm$  S.D. (n=4) \*\*p<0.01 as determined by two-sample t-test assuming equal variance.

**Figure S4. Reversion of another embryo-derived EpiSC line, EpiB3.** A) ALP staining of embryo-derived EpiB3 cells in 2iL following treatment with (+) or without (-) micropatterning ( $\mu$ P) and LIF. Colony counts listed in inset. B) Staining of revertant cells generated by  $\mu$ P<sub>LIF</sub>-treated EpiB3s demonstrates robust expression of Oct4, Sox2 and Nanog.

## Supplementary Experimental Procedures

### *qRT-PCR*

RNA was isolated using the RNeasy RNA isolation kit (Qiagen). Complimentary DNA (cDNA) was obtained from the RNA using SuperScript™ III Reverse Transcriptase (Invitrogen). cDNA was then loaded into 384-well plates (Applied Biosystems) along with primers (Supp. Table 1), and 2x Fast start SYBR green master mix (Roche). PCR was run for 40 cycles at 92°C, 60°C, and 72°C for 30s, 30s, and 15s, respectively on the ABI 7900HT Fast System (Applied Biosystems). Primer sequences were obtained from Primer Bank<sup>1</sup> or designed with Primer 3<sup>2</sup>. Data was normalized to a  $\beta$ -actin or GAPDH housekeeping control.

### *Immunocytochemistry*

Prior to imaging, cells were fixed in 3.7% formaldehyde for 10 minutes at 37°C, permeabilized in methanol for 2 minutes at room temperature, and blocked in 10% fetal bovine serum (FBS) in PBS overnight at 4°C. Primary antibodies were then added and left overnight at 4°C. Antibodies for phospho-STAT3 (Cell Signal Technologies), Oct3/4 (BD biosciences), Nanog (eBiosciences), and Sox2 (R&D), and H3K27me3 (Millipore) were all used at a 1:200 dilution. Alexa-Fluor™ (Invitrogen) secondary antibodies and Hoechst dye were added for 1 hour at room temperature diluted at 1:200 and 1:100, respectively. Stained cells were then imaged and fluorescence intensity was quantified using the Cellomics ArrayScan VTI high content screening platform (Thermo Fisher). Normalization was performed by first taking data from single-stained (e.g. Oct4 only) cells and measuring a bleed-through curve to determine the extent of background in the

channel of interest (e.g. pSTAT3). Compensation was then performed to eliminate the background from other channels.

#### *Alkaline Phosphatase Staining*

To identify alkaline phosphatase (ALP) positive colonies, cells were fixed in 10% formaldehyde for 45m at room temperature then washed 3 times in PBS. Fixed cells were then incubated in a mix of Fast Red Violet LB salt (Sigma), Napthol AS-MX (Sigma), N,N-dimethylformamide (Sigma), and 0.1mM pH=8.3 Tris-HCl Buffer for 45m at room temperature in the dark. Cells were washed with PBS and kept in PBS for imaging or colony counting. Alternatively, following fixation, the Vector® Red Alkaline Phosphatase Substrate Kit I (VectorLabs) was used as described in the kit protocol.

## References

1. A. Spandidos, X. Wang, H. Wang and B. Seed, *Nucleic Acids Res*, 38. D792-9.
2. S. Rozen and H. Skaletsky, *Methods Mol Biol*, 2000, 132. 365-86.
